# Supplementary material for: Evaluating the efficacy of nanosized CuZnAl and CuZnZr mixed oxides for electrocatalytic CO2 reduction
Source: Royal Society of Chemistry journal article supplement (doi:10.1039/d2dt04111a), 2023-01-01
Supplement: d2dt04111a1.pdf [file d2dt04111a1.pdf]

## Electronic Supplementary Information

### Evaluating the efficacy of nanosized CuZnAl and CuZnZr mixed oxides for electrocatalytic CO<sub>2</sub> reduction

Mohamed Mokhtar M. Mostafa<sup>a\*</sup>, Yining Li<sup>c</sup>, Wael Halawani<sup>a</sup>, Katabathini Narasimharao<sup>a</sup>, Mohamed Abdel Salam<sup>a</sup>, Abdulmohsen A. Alshehri<sup>a</sup>, Nezar H. Khadary<sup>b</sup>, Sulaiman Al-Faifi<sup>a</sup>, Lin Gu<sup>c</sup>, Abhishek Dutta Chowdhury<sup>\*\*c</sup>

<sup>a</sup> Chemistry Department, Faculty of Science, King Abdul-Aziz University, P.O. Box 80203, Jeddah 21589, Saudi Arabia.

<sup>b</sup> King Abdulaziz City for Science and Technology, Riyadh 11442, Saudi Arabia.

<sup>c</sup> College of Chemistry and Molecular Sciences, Wuhan University, Wuhan, Hubei, China, 430072.

## Electronic Supplementary Information

Table

S1:

| Catalyst | Theoretical (mol%) |       |      |      | Actual (mol%) |       |      |      |
|----------|--------------------|-------|------|------|---------------|-------|------|------|
|          | Cu                 | Zn    | Al   | Zr   | Cu            | Zn    | Al   | Zr   |
| CuZnAl   | 0.675              | 0.275 | 0.05 | --   | 0.674         | 0.274 | 0.06 | --   |
| CuZnZr   | 0.675              | 0.275 | --   | 0.05 | 0.673         | 0.273 | --   | 0.07 |

Theoretical and actual composition of the synthesized catalysts.

**Table S2:** The size of different crystallites in CuZnAl and CuZnZr samples calcined at different temperature.

| Phase                            | *Crystallite size (nm) |            |            |            |            |            |
|----------------------------------|------------------------|------------|------------|------------|------------|------------|
|                                  | CuZnAl-500             | CuZnAl-600 | CuZnAl-700 | CuZnZr-500 | CuZnZr-600 | CuZnZr-700 |
| CuO                              | 111.8                  | 44.7       | 40.6       | 28.6       | 47.3       | 55.3       |
| ZnO                              | 112.7                  | 71.4       | 46.2       | 51.7       | 57.2       | 57.4       |
| Al <sub>2</sub> O <sub>3</sub>   | -                      | -          | -          | -          | -          | -          |
| CuAl <sub>2</sub> O <sub>4</sub> | -                      | -          | 34.5       | -          | -          | -          |
| ZrO <sub>2</sub>                 | -                      | -          | -          | 35.4       | 42.8       | 50.6       |

\*Calculated using Scherrer equation and XRD data

**Table S3:** Textural properties of catalysts from N<sub>2</sub>-physisorption and chemical composition of catalysts

## Electronic Supplementary Information

| Catalyst | Calcination temperature (°C) | $S_{\text{BET}}$ (m <sup>2</sup> /g) | $V_t$ (cc/g) | Av. pore diameter (nm) |
|----------|------------------------------|--------------------------------------|--------------|------------------------|
| CuZnAl   | 500                          | 17                                   | 0.130        | 18.4                   |
|          | 600                          | 12                                   | 0.002        | 3.0                    |
|          | 700                          | 3                                    | 0.005        | 2.8                    |
| CuZnZr   | 500                          | 26                                   | 0.075        | 7.8                    |
|          | 600                          | 8                                    | 0.003        | 5.7                    |
|          | 700                          | 2                                    | 0.001        | 3.5                    |

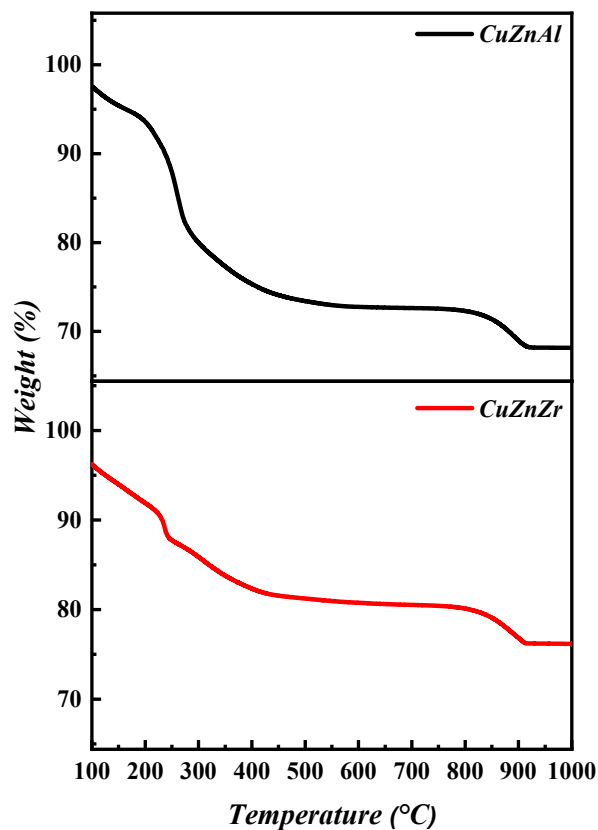

**Fig S1:** Thermograms of as-synthesized CuZnAl, and CuZnZr catalysts

## Electronic Supplementary Information

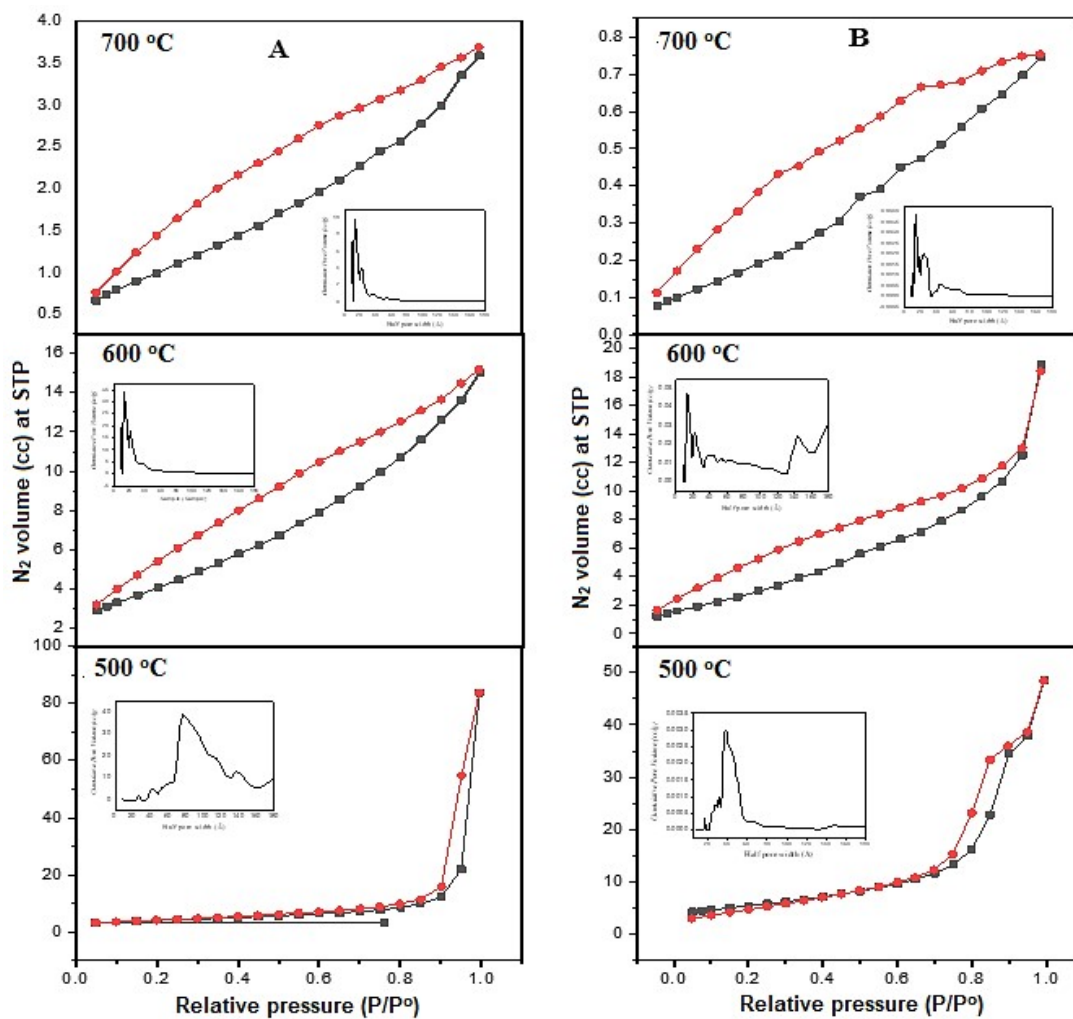

**Fig. S2:**  $N_2$  adsorption-desorption isotherms for (A) CuZnAl and (B) CuZnZr catalysts calcined in air at 500, 600, and 700 °C.

## Electronic Supplementary Information

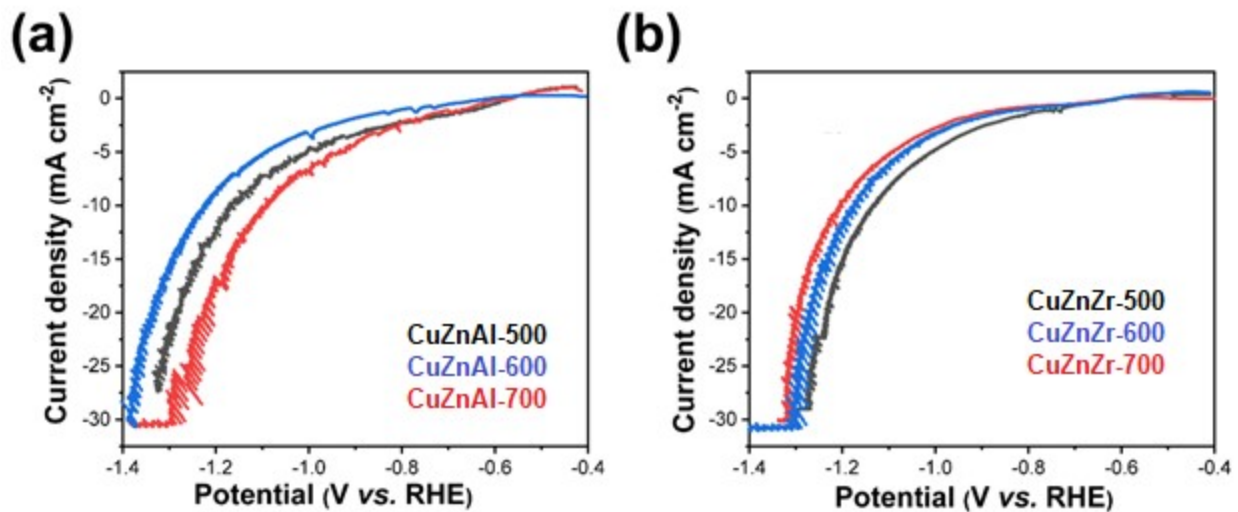

**Fig. S3:** (a) LSV curves of CuZnAl-x (temperature x=500/600/700 °C) in CO<sub>2</sub>-saturated 0.1 KHCO<sub>3</sub> solution, (b) LSV curves of CuZnZr-x (temperature x=500/600/700 °C) in CO<sub>2</sub>-saturated 0.1 KHCO<sub>3</sub> solution.

## Electronic Supplementary Information

**Table S4:** Comparison between the performance of nanosized and non-nanosized CuZn-based catalysts

| Catalyst              | Nanosized copper catalysts |                           |                         |                                         |                                       |      | Catalyst                    | Non-nanosized copper catalysts |                           |                         |                                         |                                       |      |
|-----------------------|----------------------------|---------------------------|-------------------------|-----------------------------------------|---------------------------------------|------|-----------------------------|--------------------------------|---------------------------|-------------------------|-----------------------------------------|---------------------------------------|------|
|                       | CO <sub>2</sub> R products |                           |                         |                                         |                                       |      |                             | CO <sub>2</sub> R products     |                           |                         |                                         |                                       |      |
|                       | CO, FE(%)                  | CH <sub>3</sub> OH, FE(%) | CH <sub>4</sub> , FE(%) | C <sub>2</sub> H <sub>5</sub> OH, FE(%) | C <sub>2</sub> H <sub>4</sub> , FE(%) | Ref. |                             | CO, FE(%)                      | CH <sub>3</sub> OH, FE(%) | CH <sub>4</sub> , FE(%) | C <sub>2</sub> H <sub>5</sub> OH, FE(%) | C <sub>2</sub> H <sub>4</sub> , FE(%) | Ref. |
| 7CuO/3ZnO/C           | 50                         | -                         | 3                       | -                                       | 47                                    | [1]  | PcCu-O <sub>8</sub> -Zn/CNT | 89                             | -                         | -                       | -                                       | -                                     | [5]  |
| 8CuO/2ZnO/C           | 38                         | at - 0.46 V (vs RHE)      | 5                       | at - 0.76 V (vs RHE)                    | 50                                    |      |                             |                                |                           |                         |                                         |                                       |      |
| 9CuO/1ZnO/C           | 35                         | -                         | 29                      | 46 at - 0.9 V (vs RHE)                  |                                       |      |                             |                                |                           |                         |                                         |                                       |      |
| Cu/ZnO x              | -                          | -                         | 36% at 1.1 V (vsRHE)    | -                                       | -                                     | [2]  | Cu/ZnO                      | 5.4                            | 2.8                       | 1                       | 10.2                                    | 10                                    | [6]  |
| CuZn                  | 38                         | at - 1.46 V (vs RHE)      | -                       | -                                       | -                                     | [3]  | Cu/ZnO                      | 5                              | 2                         | -                       | 12                                      | 6                                     | [7]  |
| CuZn_240              | 36                         |                           | -                       | -                                       | -                                     |      |                             |                                |                           |                         |                                         |                                       |      |
| CuZn_300              | 37                         |                           | -                       | -                                       | -                                     |      |                             |                                |                           |                         |                                         |                                       |      |
| CuO-ZnO <sub>10</sub> | -                          | 15 at - 0.6 V (vs RHE)    | -                       | 22 at -0.8 V (vs RHE)                   | -                                     | [4]  |                             |                                |                           |                         |                                         |                                       |      |

[1] Z. Li *et al.*, “CuO/ZnO/C electrocatalysts for CO<sub>2</sub>-to-C<sub>2+</sub> products conversion with high yield: On the effect of geometric structure and composition,” *Appl. Catal. A: Gen.*, 606 (2020) 117829, doi: 10.1016/j.apcata.2020.117829.

[2] R. Wang *et al.*, “Engineering a Cu/ZnO<sub>x</sub> Interface for High Methane Selectivity in CO<sub>2</sub> Electrochemical Reduction,” *Ind. Eng. Chem. Res.*, 60 (2021) 273–280, doi: 10.1021/acs.iecr.0c04718.

[3] C. Azenha *et al.*, “Tuning the selectivity of Cu<sub>2</sub>O/ZnO catalyst for CO<sub>2</sub> electrochemical reduction,” *J. CO<sub>2</sub> Utilization* 68 (2023) doi: 10.1016/j.jcou.2022.102368.

[4] S. Dongare, *et al.*, “Electrochemical reduction of CO<sub>2</sub> using oxide based Cu and Zn bimetallic catalyst,” *Electrochim. Acta*, 392 (2021) doi: 10.1016/j.electacta.2021.138988.

[5] H. Zhong *et al.*, “Synergistic electroreduction of carbon dioxide to carbon monoxide on bimetallic layered conjugated metal-organic frameworks,” *Nat. Commun.*, 11 (2020) 1409, doi: 10.1038/s41467-020-15141-y.

[6] E. Andrews *et al.*, “Electrochemical Reduction of CO<sub>2</sub> at Cu Nanocluster/(10 $\bar{1}$ 0) ZnO Electrodes,” *J Electrochem Soc.*, 160 (2013) H841–H846, doi: 10.1149/2.105311jes.

[7] T. Liang *et al.*, “Molecular dynamics simulations of CO<sub>2</sub> reduction on Cu(111) and Cu/ZnO(10 $\bar{1}$ 0) using charge optimized many body potentials,” *Catal. Commun.*, 52 (2014) 84–87, doi: 10.1016/j.catcom.2013.11.033.
